# Supplementary material
Source: ML conference proceedings conference paper supplement (https://openaccess.thecvf.com/content/cvpr_2017/html/Vongkulbhisal_Discriminative_Optimization_Theory_2017_CVPR_paper.html)
Supplement: Supplementary file 2 [file Vongkulbhisal_Discriminative_Optimization_Theory_2017_CVPR_supplemental.zip]

Archive with 2 entries (2 files):
- DO supplementary document.pdf
- DO supplementary video.mp4
